# Supplementary material
Source: publisher site journal article supplement (https://www.dovepress.com/article/503216)
Supplement: Supplementary file 1 [file get_supplementary_file.php]

****Supplementary Table 1** | **Assessment Table According to** Newcastle-Ottawa Scale**

| Author, Year | Selection | Comparability | Outcome | Total Score |
| --- | --- | --- | --- | --- |
| Defeudis,2022 | 3 | 1 | 3 | 7 |
| Giagulli, 2015 | 3 | 1 | 2 | 6 |
| Giuseppe,2023 | 3 | 2 | 3 | 8 |
